# Supplementary material for: A Self-Powered Biosensor for the Detection of Glutathione
Source: PubMed Central journal article supplement (PMC7558183; doi:10.3390/bios10090114), 2020-09-03
Supplement: biosensors-10-00114-s001.pdf [file biosensors-10-00114-s001.pdf]

## A Self-Powered Biosensor for the Detection of Glutathione

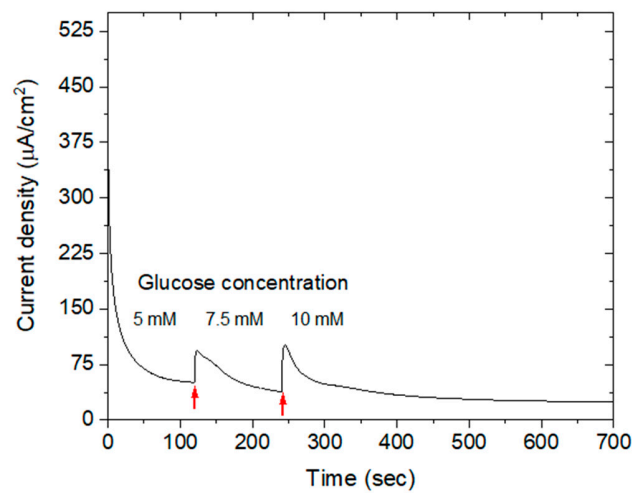

**Figure S1.** Current density measured at 0 V for a glucose biofuel cell in 0.1 M phosphate buffer, pH 7.4, with 100  $\mu$ M glutathione and varying concentrations of glucose. Red arrows indicate the time glucose was added to the solution.

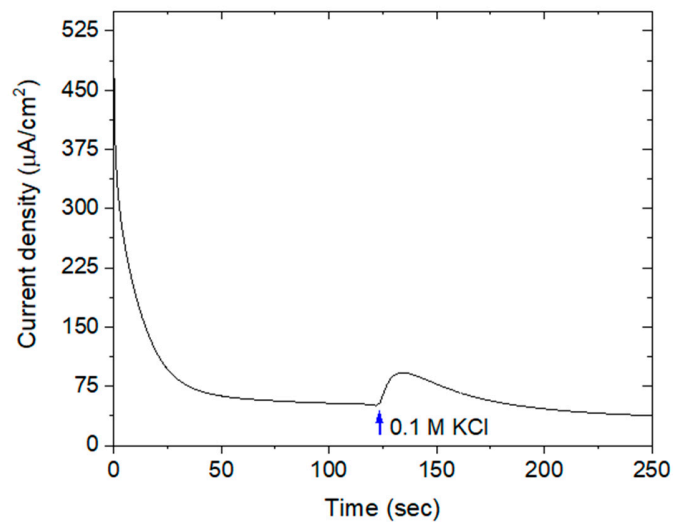

**Figure S2.** Current density measured at 0 V for a glucose biofuel cell in 0.1 M phosphate buffer, pH 7.4, with 100  $\mu$ M glutathione and 10 mM glucose. The blue arrow indicates the time solution was added to a final concentration of 0.1 M KCl.
